# Supplementary material
Source: Springer Nature journal article supplement (https://www.springermedizin.de/resource/supplementary/12935_2009_270_MOESM6_ESM.pdf/9540188)

positive cells percentage

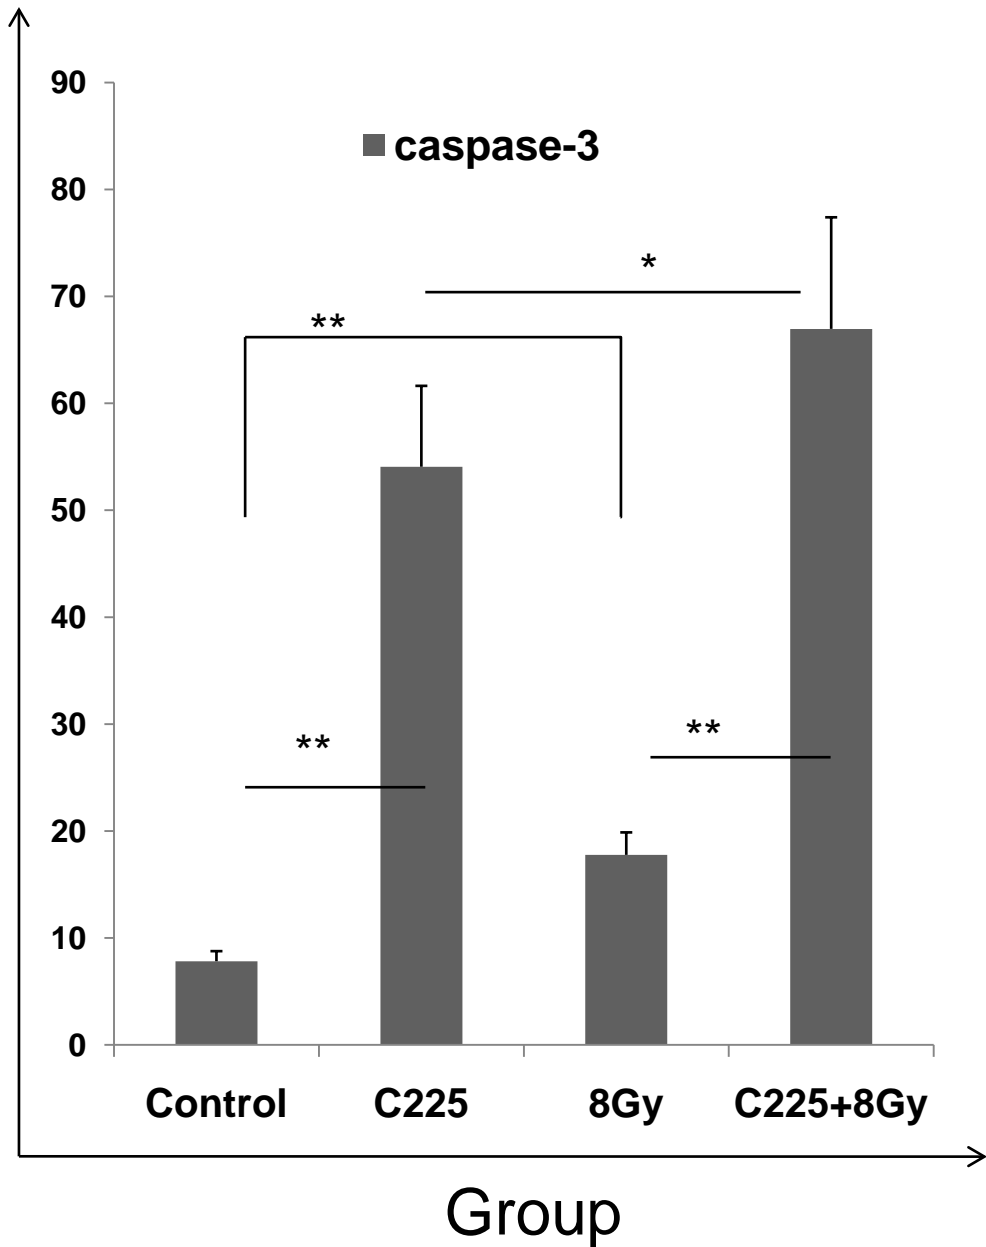

Supplement: MOESM6 [file 9540188]
